# Supplementary material for: The impact of coupled 3D radiative transfer on surface radiation and cumulus clouds over land
Source: Copernicus journal article supplement (doi:10.5194/egusphere-2024-1519), 2024-05-24
Supplement: Supplementary file [file egusphere-2024-1519-AC3-supplement.pdf]

## **Review of “The impact of coupled 3D radiative transfer on surface radiation and cumulus clouds over land” by Tjihuis et al.**

### General comments

This paper presents large eddy simulations of continental cumulus clouds with a coupled shortwave 3D radiation scheme. Results are compared to simulations with a standard 1D radiation scheme to assess the impact of shortwave 3D radiation effects on the clouds and surface radiation. Simulations with 3D radiation are found to have larger and deeper clouds, which reflect more shortwave radiation and therefore reduce the surface shortwave radiation. This acts in the opposite direction to non-coupled 3D radiation effects that tend to enhance the surface shortwave radiation. Overall, there is an almost exact compensation such that the mean surface shortwave radiation in simulations with 1D and 3D radiation is very similar. This finding is based on multiple simulated days.

The paper is clear and well written. I learned a lot from reading this paper. I would like to congratulate the authors on their significant new findings. The conclusions are mostly convincing, and not necessarily expected. I think this paper will spur further studies and will become a well cited reference in the coming years. I have a few suggestions to further strengthen the study, as outlined in my comments below. After addressing these comments, I believe the study will be appropriate for publication in ACP.

We want to thank the reviewer for the kind words about our manuscript and for taking the time to review our manuscript. We address the given comments below (in green text).

### Specific comments

1. Title: I suggest changing to “The impact of coupled shortwave 3D radiative transfer on surface radiation and cumulus clouds over land” because the authors did not consider coupled longwave. This is already mentioned in the manuscript, but it would add clarity to put this extra word in the title.  
We will add this to the title as suggested.
2. Introduction: Several references are made to “cloud resolving models”. I think the authors are only referring to large eddy simulations (LES). Often, the term “cloud resolving model” is used to refer to a model that is run without a convection scheme. These models can still have horizontal resolution of a few km, but I don’t think that’s what the authors intend. I recommend saying LES from the beginning, or even better explicitly state the range of horizontal resolutions that are used in the cited studies.  
For these models it also holds that the cloud and its shadow will not be located in the same grid box, hence 3D effects are relevant. We will rephrase this such that it refers to both cloud resolving models and large eddy simulations.
3. L47-49: It is interesting that the study from Jakub and Mayer claimed that cloud organization (cloud streets) occur with coupled 3D radiation, but the studies by Veerman et al. and the present study do not seem to identify or even mention cloud organization. I think it is worth mentioning this difference in the

introduction and/or conclusions as a potential discrepancy that exists in the literature.

We agree with the reviewer that it would be interesting to identify the cloud organization to compare with the results of Jakub and Mayer. Unfortunately, determining if and how the clouds organize in our cases is more complex than in the cases of Jakub and Mayer. Jakub and Mayer use fixed solar azimuth angles and wind directions, which limits the formation of cloud streets to the north-south and east-west direction. This allows for an intuitive quantification of the cloud organization. In our cases (and also in the ones in both studies of Veerman et al) the solar azimuth angle changes continuously following the daily cycle of the sun and the wind direction is never perfectly in the north-south or east-west direction. Therefore, it is not trivial to describe the cloud organization, and one would need to carefully examine different methods to describe cloud organization, which is beyond the scope of the present study. However, we will elaborate the indicated lines to highlight the differences between the setups better, as the different setups explain why cloud organization as it is described in Jakub and Mayer is not considered in the present study. In addition, we will shortly describe in section 4.1. why we do not investigate the cloud organization as they do in Jakub and Meyer.

4. L75-76: It would be helpful to expand on what is meant by “the days where the simulated cloud cover visually matches the observed cloud cover”. What is the criteria for a match? For example, does the match consider only cloud cover or also cloud size, shape, organization, etc?

We will expand on the meaning of ‘visually match’. Our criterium for a match is that there is no systematic under or overestimating of the cloud cover by tens of percents, which can happen e.g. when the clouds are forced by a large-scale system that is not captured by the LES. It only considers cloud cover, as we only have observations of cloud cover.

5. Section 2.1: I recommend listing the exact dates that were used for the clear-sky (13 days), cloudy (20 days), and subset cloudy (12 days). Or put them in a table. This is needed for reproducibility reasons.

We will add a list of dates to the complete model setup in the zenodo repository.

6. L82: I do not see any supplementary materials uploaded. Can the details of the LES model be referred to previous literature?

Our apologies for this mistake, this should refer to the zenodo repository that is mentioned in the code and data availability statement. We will put the correct reference in the text.

7. L88: A couple of sentences explaining what the land surface model is actually doing would help here. How realistic is the assumption of an instantaneous surface response? I am concerned that this assumption might make the coupling with the clouds too strong. If, in reality, there is some delay of the surface response, then the clouds could evolve or be advected before they “feel” the surface immediately below them. I would have thought that the land surface model needs to account for the processes that determine the response time of the surface such as heat transfer between vegetation and soil layers, and stomatal opening/closing.

We will add a couple sentences to the manuscript that describe the land surface model. The land surface model includes heat transfer between the skin layer and the soil layers below. Because of this coupling, part of the surface response is actually delayed. This works in the following way: a peak in radiation causes an immediate heating of the skin layer, which causes a large soil heat flux. The soil layer that receives this heat flux warms up slowly and can provide an upward flux back to the skin layer at a later moment. Hence, in a way part of the surface response is delayed. We agree with the reviewer that for the most accurate response of the surface, the stomatal opening/closing should be considered, but this is not included in our land surface model. This would require the addition of a plant model, as is e.g. used by Sikma and Vila (GRL, 2019). Please see also our answer at the first major comment of reviewer 2, where we discuss the skin heat capacity.

8. L90: Can some justification be provided that the radiation calls once every minute are sufficient? The appendix shows that the wind speed often exceeds 5 m/s at 10 m altitude. The wind speed at cloud altitude is probably even larger. Taking 5 m/s as a typical wind speed, in the 1 minute between radiation calls a cloud would be advected 300 m. Figure 4d shows that 300 m is comparable to the length scale of the simulations. This means that an individual cloud will move a distance that is comparable to the size of its shadow before the position of the shadow is updated in the simulation, which seems quite “jumpy”. Given that the study depends critically upon the land-atmosphere coupling imposed by the evolving pattern of cloud shadows, I think the reader needs some more convincing on this decision.

To test the sensitivity to the radiation timestep we performed one simulation with 1D radiation and one with 3D radiation for the chosen example day in figure 5 with the radiation called every 15 seconds. The differences between these two runs are given by the dashed lines in the plot below. Apart from the dashed lines, this plot is identical to figure 5 in the manuscript.

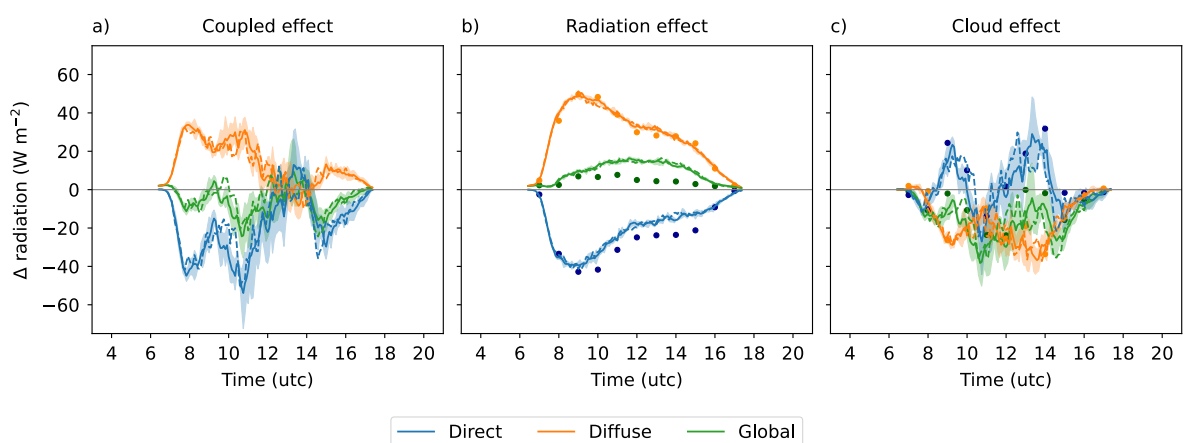

Most of the time, the difference between the simulations with 15 second radiation is within the range that we found for the simulations with 1 minute radiation. Around 10 o'clock the differences with 15 second radiation are slightly outside of the range that we found before. However, these minor changes in the

radiation differences will not change our conclusions. We will shortly mention this in the manuscript.

9. L108-112: This hypothesis would benefit from some discussion of the time/length scales of the boundary layer mixing. The surface is not instantaneously connected to the cloud immediately above it. It takes time for perturbations in surface fluxes to be transported up to cloud base. And during this transport there must also be some mixing that occurs, such that the variability at cloud base is not as sharp as the surface. For the clouds to be influenced, I think it has to be the case that:

1. the timescale for mixing to cloud base is shorter than the timescales of individual cloud evolution and movement, and
2. the surface discontinuities are not simply mixed away during transport to the cloud layer.

For example, one recent study that considered how these types of clouds change during a solar eclipse suggested that the fastest timescale for surface air parcels to be transported to cloud altitude is around 15 minutes (<https://doi.org/10.1038/s43247-024-01213-0>). It is not clear that this is shorter than the timescales of cloud movement and growth/decay, which leads me to question this hypothesis.

It is hard to give a general discussion about the time and length scales involved because of the large range of scales involved. As figure 4d shows, the length scales involved differ strongly between the individual dates and times. Heus and Seifert (gmd, 2013) showed that the lifetime of shallow cumulus can range from less than 1 minute up to 120 minutes. The recent study about the solar eclipse also shows that the updraft speed continuously changes during the day. Altogether this indicates that to test our hypothesis further than what we did now, one should look at the individual days/times/clouds. Only this would allow to determine if and when the updraft speed and location match the cloud movement and development. To do so is tricky with the current setup because of the potential influence that the clouds have on each other. Therefore, a more idealistic setup might yield further insights (as we suggest in line 333), but this is beyond the scope of the present work.

We agree with the reviewer that some of the surface variability is mixed away during the upward transport, however definitely not all the variability is mixed away. If all the variability would be mixed away before the cloud layer is reached, there would be no 3D effect because of the surface heterogeneities. Veerman et al 2022 showed that when the surface radiation is homogenized, the simulations with 1D and 3D radiation give nearly identical clouds. Hence, the surface discontinuities are key to get a difference between simulations with 1D and 3D radiation.

10. L158: Give -> Given

We will change this as suggested.

11. L161-162: At large RH, above 90% or so, even a small change in RH can result in a large change in optical properties due to the non-linearity in aerosol extinction as a function of RH. Are the optical properties defined per 10% RH even at high RH? If so, this likely introduces an important source of error for aerosol optical properties in the vicinity of clouds. These errors will not be evident in the clear

sky cases that are used for validation, but they will be present on cloudy days because RH will approach 100% toward cloud edges.

Our apologies for the incomplete description. The optical properties are defined per 10% RH between 0 and 80% RH, after that, the properties are described per 5% RH. We will correct this in the manuscript.

The intervals indeed introduce an error at high rh because of the non-linearity in aerosol optical properties. However, the error that remains with the 5% classes is likely small compared to the differences between observed and simulated radiation caused by differences between observed and simulated clouds. As our main aim with the aerosol implementation is to remove the systematic bias that we had before, we argue that the 5% classes are sufficient.

12. L172: It should be noted that the definition of cloud cover in observations and models is slightly different here. A scanning or wide-field view instrument will detect and include cloud sides as part of the overall cloud cover. In contrast, cloud cover in the LES model is defined only from a zenith view perspective. This will generally lead to an overestimate of cloud cover in observations relative to LES, unless an instrument simulator is used within the LES to ensure sampling consistency (which I don't think is done here). This fact also has implications for one of the main results of the study, that the clouds are deeper in 3D coupled radiation but the cloud cover is the same. This may be true with the model definition of cloud cover. But from an observational perspective, the cloud cover could actually still increase because the deepening of clouds results in more of the sky becoming obscured at oblique views of the instrument. This is worth commenting on in the conclusions.

The reviewer is correct that we don't have an instrument simulator in our LES and the definition of cloud cover is different from an observational perspective compared to the model. We are aware of this difference and therefore we don't aim for a perfect match between observations and simulation. We will mention this difference when we discuss figure 3 (last paragraph of section 3). We will also explicitly mention here that we use the model definition of the cloud cover in the remainder of the paper.

13. L211-223: Can a statistical significance test be done to determine whether the correlations presented are significant? That would make the presented correlations more convincing.

We thank the reviewer for this suggestion, and we agree that this makes the correlations more convincing. We tested the significance and found the following results:

- for shadow displacement:  $r = 0.266$ ,  $p = 3.32e-09$
- for wind-sun-angle:  $r = 0.554$ ,  $p = 4.32e-40$
- for wind speed:  $r = 0.330$ ,  $p = 1.153e-13$

Hence the correlations are significant, which we will mention in the manuscript.

14. L211-231: Similar to my comment above about the hypothesis for cloud changes, I think this discussion would benefit from considering the time and space scales involved.

Please see our consideration of the time and length scales at the comment above.

If the hypothesis holds, the correlation should be highest for a combination of the factors explored: when the wind direction is aligned with the sun angle AND the shadow displacement divided by the wind speed is similar to the cloud base height divided by the updraft speed. Could the authors look at this explicitly and see if they find a connection?

We defined the the time scale mismatch as the shadow displacement divided by the wind speed minus the cloud base height divided by the updraft speed. If we understand the comment correctly, the reviewer suggests that there should be a high correlation between the difference in liquid water path and the combination of the wind sun angle and this time scale mismatch. We tested this and found a correlation coefficient of 0.56, which is practically the same correlation as we found with the wind sun angle alone.

We agree with the reviewer that if the wind sun angle is small and the time scale mismatch is small, the clouds in the simulations with 3D radiation feel their own shadows most, hence the difference in liquid water path might be small.

However, when a cloud moves away from its own shadow or perpendicular to its own shadow, a matching time scale does not necessarily result in a stronger or weaker cloud development. This will depend on the location of the shadows of other clouds and potentially on the location of the strongest cloud enhancements. Therefore, adding the time-scale mismatch does not add to the correlation that is found with only the wind sun angle.

It would be interesting to look at only cases where the wind direct is aligned with the sun angle to see if indeed a smaller time scale mismatch results in a smaller 3D effect. Unfortunately, if we select only the times where the wind direction is aligned with the sun angle (difference in angle < 25 degrees), only 1/8 of our dataset remains and the variation in time scale mismatch is very limited. A more idealized setup (as we suggest at the end of our manuscript) where e.g. the wind-direction and sun angle are fixed might therefore yield more insight.

I also wonder if it is possible that this combination of factors could lead to a suppression of cloud development in 3D in the case that clouds are systematically moving toward their shadows in 3D. Do the authors see any evidence of this? If not, does this provide evidence to reject the proposed hypothesis?

We agree that the combination of factors could lead to the suppression of cloud development in 3D if the clouds are moving towards their own shadows. The opposite should be the case when the clouds move away from their own shadows. Both must be the case to have a good correlation between the difference in liquid water path and the wind-sun angle. A small wind-sun angle (the cloud moving towards its own shadow) should correspond to a small difference in liquid water path and opposingly a large wind-sun angle (the cloud moving away from its own shadow) should correspond to a large difference in liquid water path. The significantly positive correlation between wind-sun angle and differences in liquid water path provides some evidence that this is the case. However, it is important to note that this theory only takes into account the impact of the clouds own shadow, whereas clouds can in our setup also be influences by shadows of other clouds, hence we cannot expect a perfect correlation.



15. Fig. 6: Are the box plots showing the mean across the entire day or at a specific time during the day? I might have missed it but I don't see this mentioned anywhere.

It shows all times with clouds. We will mention this in the caption of the figure.

16. Section 4.2.1 and Fig. 5b: The global uncoupled effect is always positive, meaning that the diffuse effect dominates throughout the day. The Gristey et al paper that is already cited showed that the global effect can be negative at the end of the day on some days, because the direct effect can dominate at oblique sun angles. I am curious, do the authors see this on any of their simulated days, or is the global effect positive for all times of day and all cases? This would be an interesting similarity or difference to note in the paper.

We thank the reviewer for bringing up this similarity between our work and the work of Gristey et al. As can be seen from the boxplot in figure 6b, there are some timesteps with a slightly negative global uncoupled effect (or radiation effect as it will be named after the revisions). These moments are indeed at the end of some of the days. We will shortly mention this in relation with the Gristey et al paper.

17. Schematic figure of key result: I think this paper would really benefit from a schematic figure that captures the main result in the abstract ie. the almost exact compensation between uncoupled and cloud 3D effects. I encourage the authors to consider creating a schematic that represents this result in an intuitive and concise way. Figure 1 achieves this for the methodology. I am thinking of something similar to Figure 1, but for the results. This type of figure can help to engage a broader audience and increase the impact of the study.

We noticed that most papers in ACP support their abstract with a complete figure from the paper. We agree with the reviewer that something more concise is helpful for a broader audience, hence we opted for a simplified version of figure 6 that only shows the main results i.e. the almost exact compensation between uncoupled and cloud 3D effects.

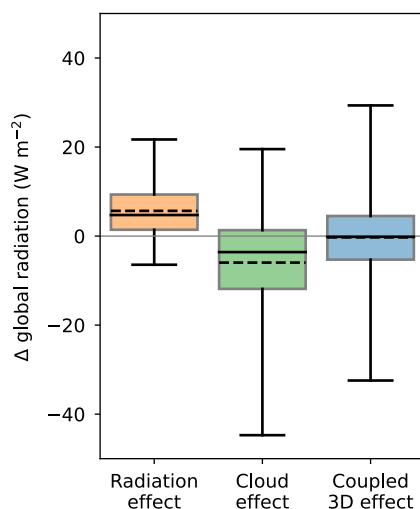

#### Additional references

- Sikma, M., & Vilà-Guerau de Arellano, J. (2019). Substantial reductions in cloud cover and moisture transport by dynamic plant responses. *Geophysical Research Letters*, 46(3), 1870-1878.
- Heus, T., & Seifert, A. (2013). Automated tracking of shallow cumulus clouds in large domain, long duration large eddy simulations. *Geoscientific Model Development*, 6(4), 1261-1273.
